# Supplementary material for: Designed synthesis of Co(ii) coordination polymers for evaluation of structural transformations
Source: Royal Society of Chemistry journal article supplement (doi:10.1039/d4ce00723a), 2024-01-01
Supplement: d4ce00723a1.pdf [file d4ce00723a1.pdf]

## Supplementary materials

### Designed Synthesis of Co(II) Coordination Polymers for Evaluation of Structural Transformations

Chia-Yi Lee,<sup>a</sup> Muhammad Usman,<sup>a</sup> Song-Wei Wang,<sup>a</sup> Kedar Bahadur Thapa,<sup>b</sup> Tsun-Ren Chen<sup>c\*</sup> and Jhy-Der Chen<sup>a\*</sup>

<sup>a</sup>*Department of Chemistry, Chung Yuan Christian University, Chung-Li 320, Taiwan, R.O.C. E-mail:*

[jdchen@cycu.edu.tw](mailto:jdchen@cycu.edu.tw)

<sup>b</sup>*Makawanpur Multiple Campus, affiliated to Tribhuvan University, Municipality Rd, Hetauda, Nepal*

<sup>c</sup>*Department of Applied Chemistry, National Pingtung University, Pingtung 90003, Taiwan, R.O.C. E-mail:*

[trchen@mail.nptu.edu.tw](mailto:trchen@mail.nptu.edu.tw)

## Contents

- Fig. S1.** The infrared spectra of complexes **1 – 4**.
- Fig. S2.** The infrared spectrum of complex **5**.
- Table S1.** Reaction conditions and yields for each attempt to prepare **1 – 5**.
- Fig. S3.** The PXRD patterns of complex **1**.
- Fig. S4.** The PXRD patterns of complex **2**.
- Fig. S5.** The PXRD patterns of complex **3**.
- Fig. S6.** The PXRD patterns of complex **4**.
- Fig. S7.** The PXRD patterns of complex **5**.
- Fig. S8.** TGA curve of complex **1**.
- Fig. S9.** TGA curve of complex **2**.
- Fig. S10.** TGA curve of complex **3**.
- Fig. S11.** TGA curve of complex **4**.
- Fig. S12.** TGA curve of complex **5**.
- Fig. S13.** PXRD patterns of complex **1** immersed in solvents.
- Fig. S14.** PXRD patterns of complex **2** immersed in solvents.
- Fig. S15.** PXRD patterns of complex **3** immersed in solvents.
- Fig. S16.** PXRD patterns of complex **4** immersed in solvents.
- Fig. S17.** (a) Photo and (b) PXRD patterns of complex **1** heated at 150 °C for 2 hrs and then immersed in a variety of organic solvents.
- Fig. S18.** Photo and PXRD patterns of complex **2** heated at 200 °C for 2 hrs.
- Fig. S19.** Photo and PXRD patterns of complex **3** heated at 100 °C for 2 hrs and then immersed in a variety of organic solvents.
- Fig. S20.** (a) Photo and (b) PXRD patterns of complex **4** heated at 200 °C for 2 hrs and then immersed in a variety of organic solvents.
- Fig. S21.** PXRD patterns of complexes **1 - 4** heated hydrothermally at 120 °C.
- Fig. S22.** IR spectra for complexes **1 - 4** heated hydrothermally at 120 °C.
- Fig. S23.** Element analysis for MBA-unknown.

**Fig. S1.** The infrared spectra of complexes **1** – **4**.

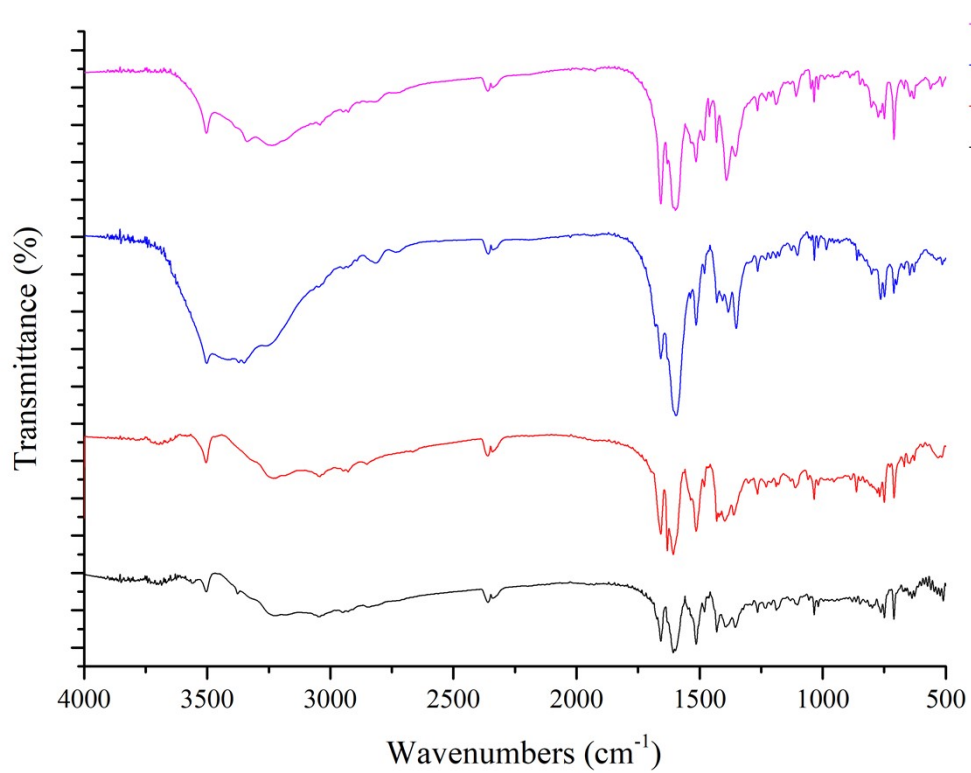

**Fig. S2.** The infrared spectrum of complex **5**.

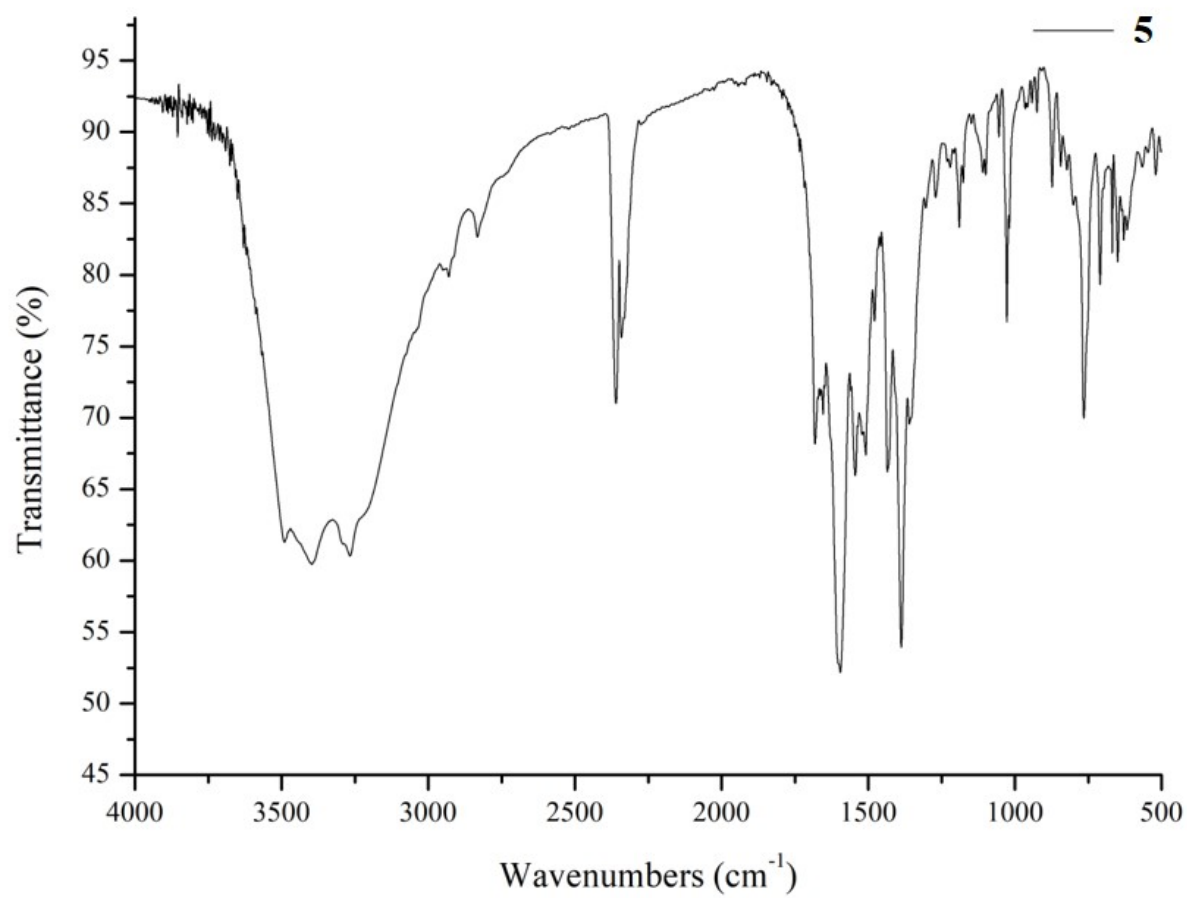

**Table S1.** Reaction conditions and yields for each attempt to prepare **1 – 5**.

| Reagents                                                                                                | Solvent                                       | Temp., Time    | Complex  | Yield, % |
|---------------------------------------------------------------------------------------------------------|-----------------------------------------------|----------------|----------|----------|
| Co(OAc) <sub>2</sub><br>(0.2 mmol)<br>+<br><b>L</b><br>(0.1 mmol)<br>+<br>H <sub>2</sub> MBA (0.1 mmol) | 10 mL<br>H <sub>2</sub> O                     | 60 °C, 2 days  | <b>4</b> | 19.53    |
|                                                                                                         |                                               | 80 °C, 2 days  | <b>4</b> | 20.90    |
|                                                                                                         |                                               | 100 °C, 2 days | <b>3</b> | 7.99     |
|                                                                                                         |                                               |                | <b>4</b> | 4.66     |
|                                                                                                         |                                               | 120 °C, 2 days | <b>3</b> | 22.79    |
|                                                                                                         | 8 mL<br>H <sub>2</sub> O                      | 60 °C, 1 days  | <b>2</b> | 2.75     |
|                                                                                                         |                                               | <b>4</b>       | 14.85    |          |
|                                                                                                         | +<br>2 mL                                     | 60 °C, 2 days  | <b>2</b> | 2.44     |
|                                                                                                         |                                               |                | <b>4</b> | 15.01    |
|                                                                                                         | MeOH                                          | 80 °C, 2 days  | <b>4</b> | 20.74    |
|                                                                                                         |                                               | 80 °C, 4 days  | <b>1</b> | 20.08    |
|                                                                                                         | 5 mL<br>H <sub>2</sub> O<br>+<br>5 mL<br>MeOH | 60 °C, 1 days  | <b>2</b> | 23.26    |
|                                                                                                         |                                               | 60 °C, 2 days  | <b>2</b> | 16.78    |
|                                                                                                         |                                               |                | <b>5</b> | 0.39     |
|                                                                                                         |                                               | 60 °C, 4 days  | <b>5</b> | 15.78    |

**Fig. S3.** The PXRD patterns of complex 1.

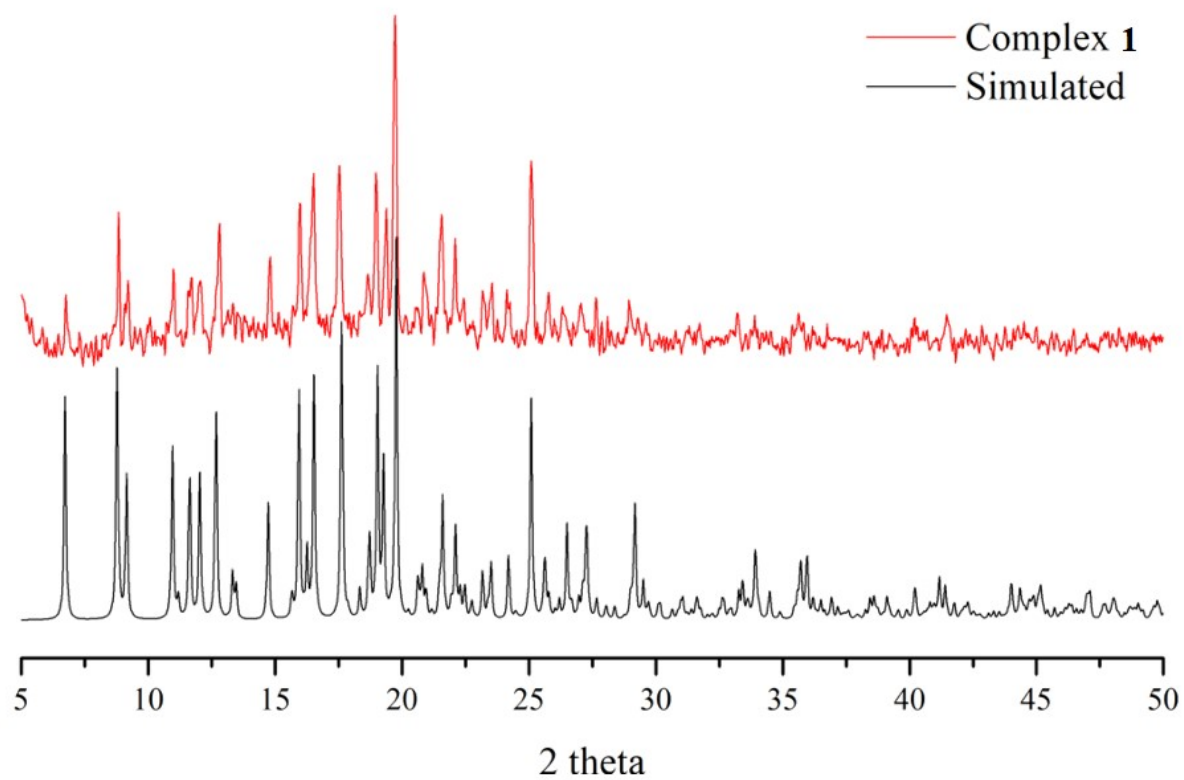

**Fig. S4.** The PXRD patterns of complex 2.

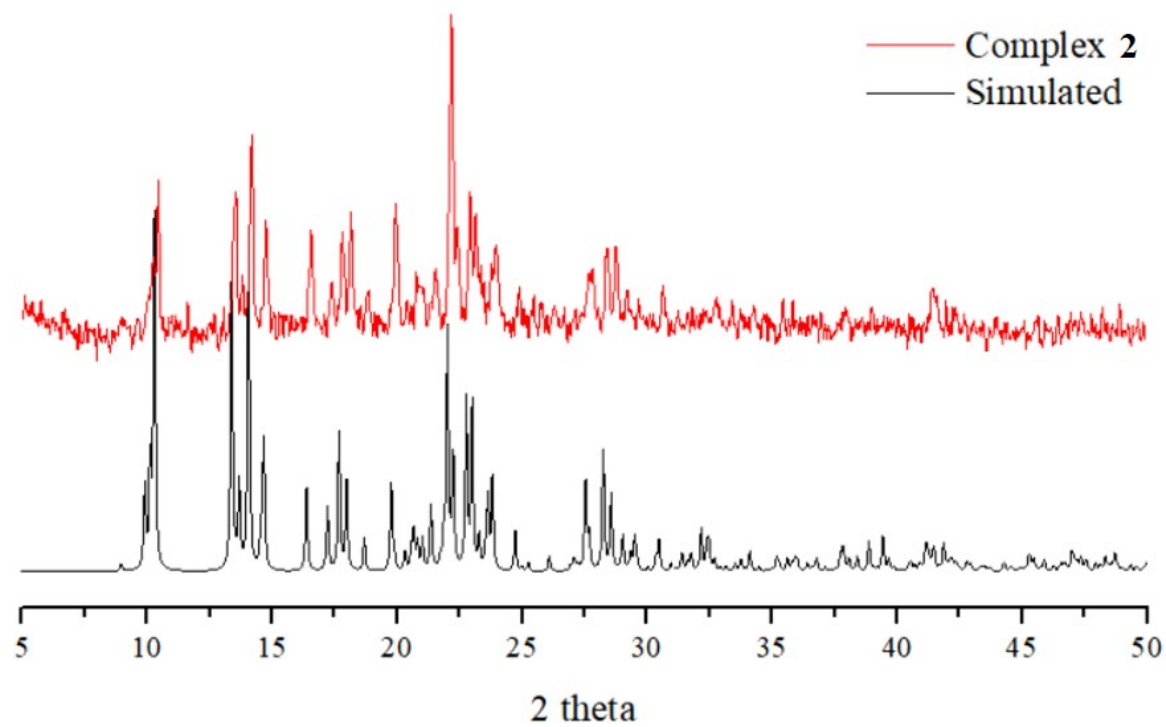

**Fig. S5.** The PXRD patterns of complex **3**.

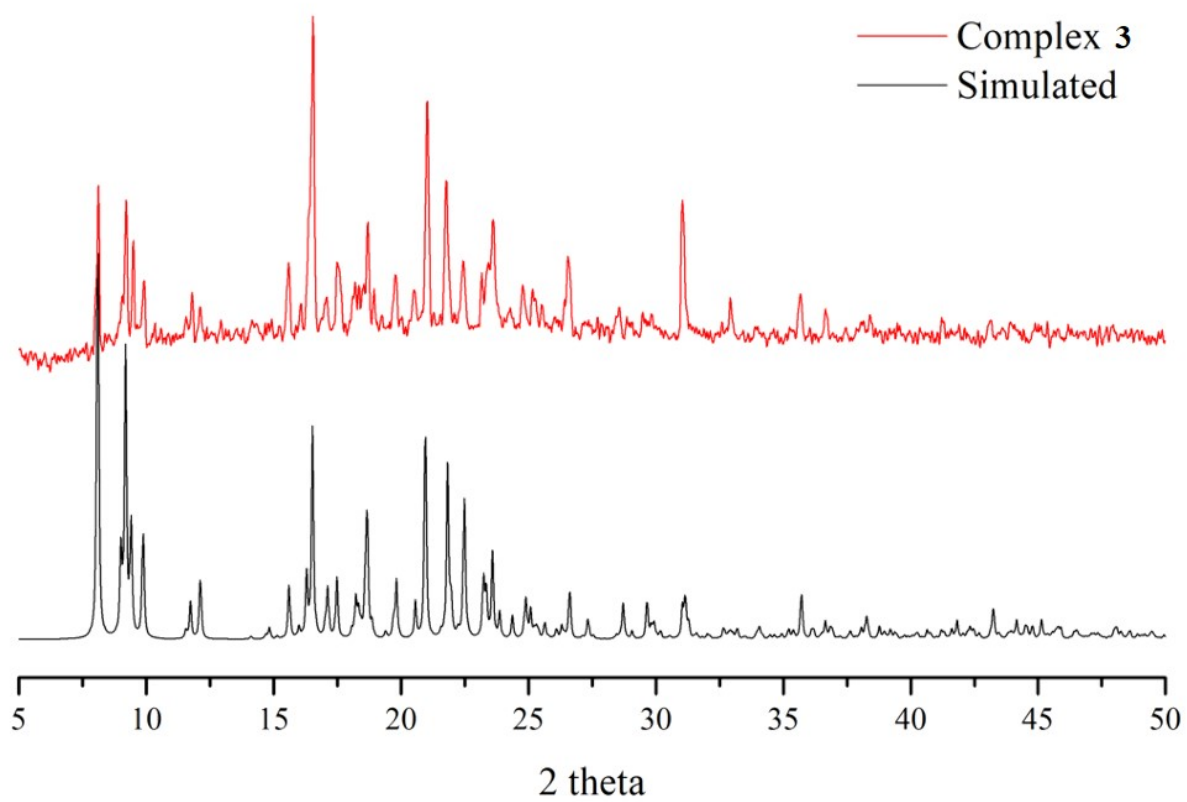



**Fig. S6.** The PXRD patterns of complex **4**.

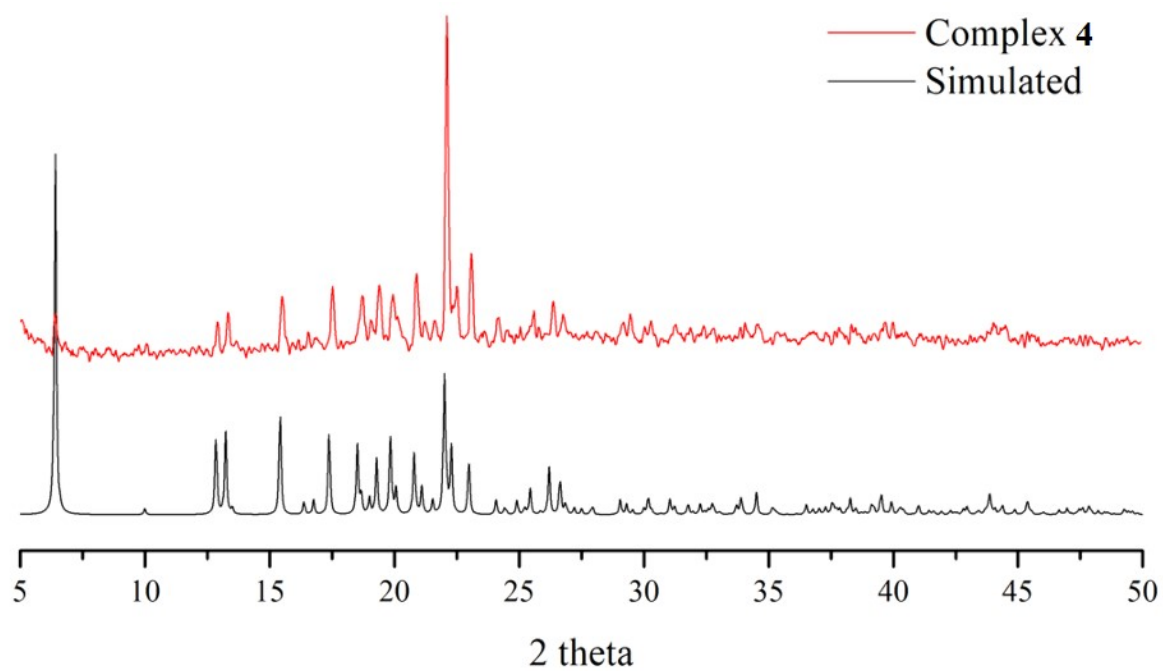

**Fig. S7.** The PXRD patterns of complex **5**.

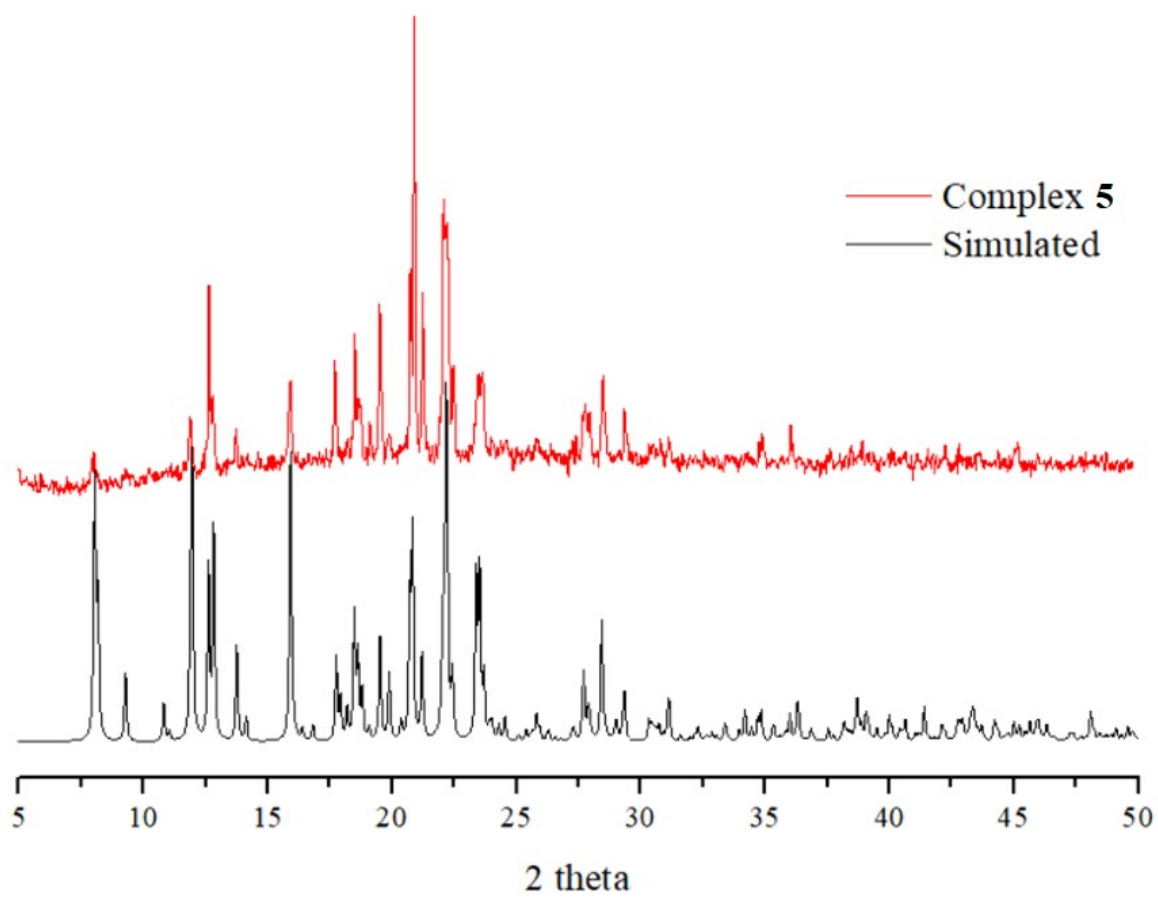

**Fig. S8.** TGA curve of complex **1**.

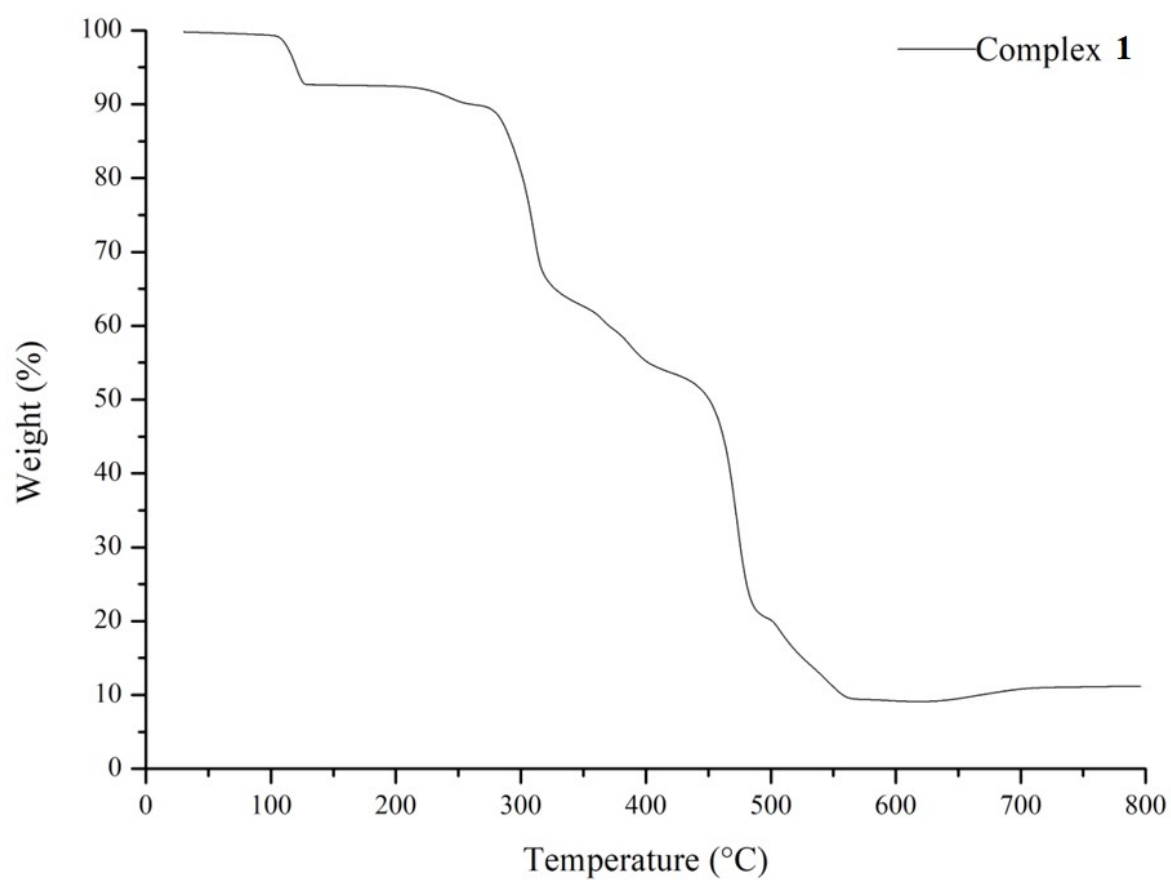

**Fig. S9.** TGA curve of complex 2.

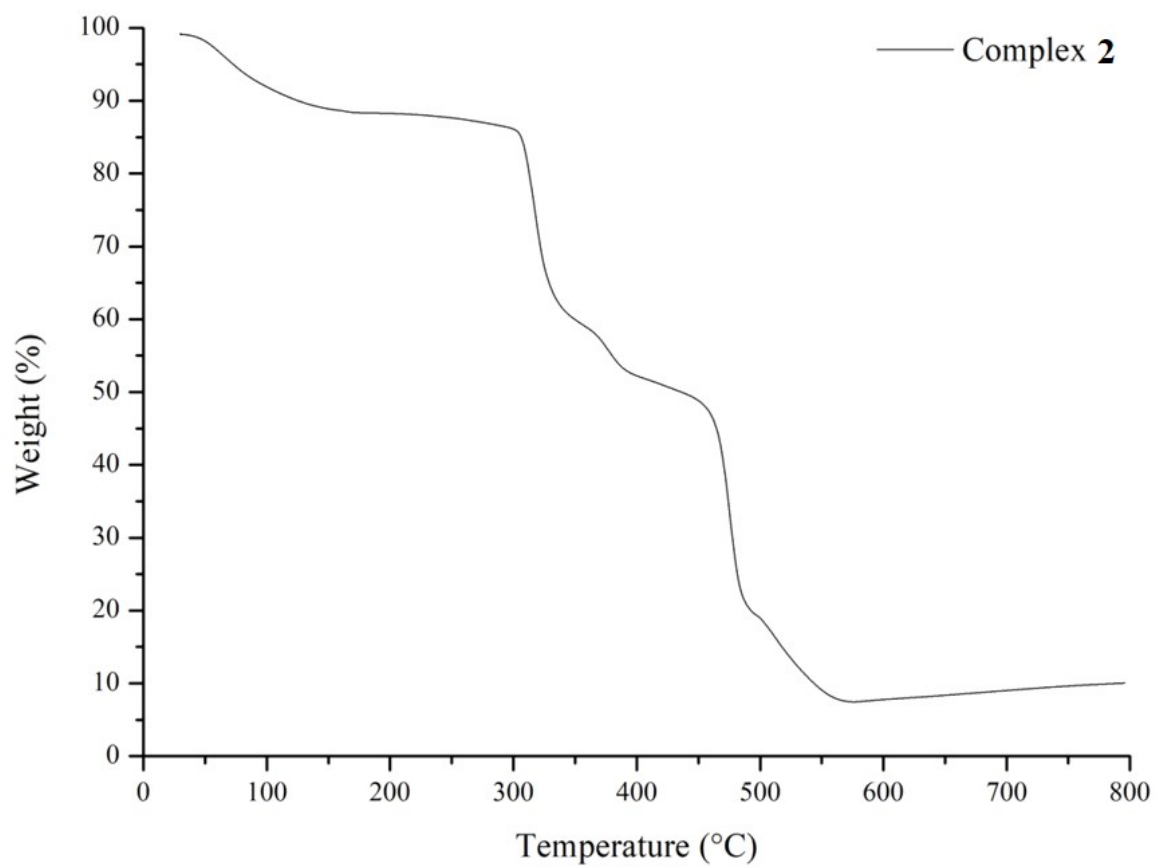

**Fig. S10.** TGA curve of complex **3**.

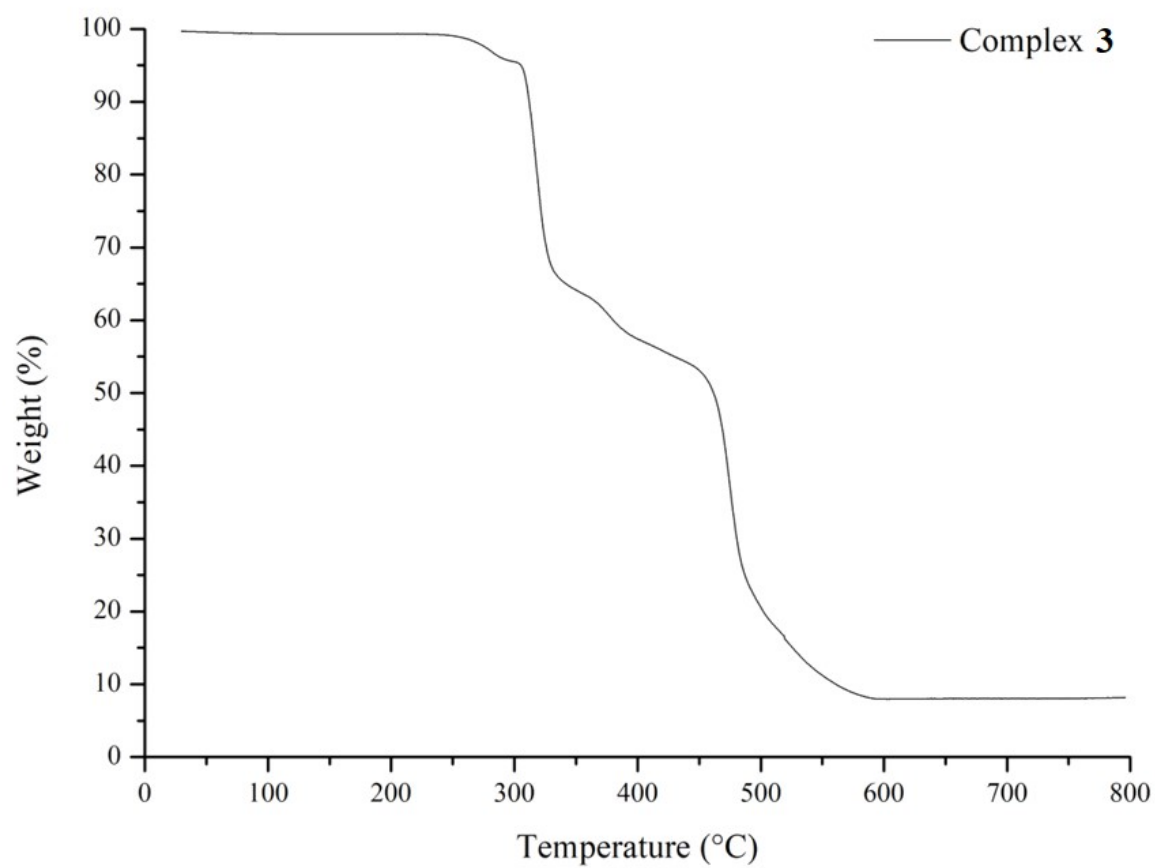

**Fig. S11.** TGA curve of complex 4.

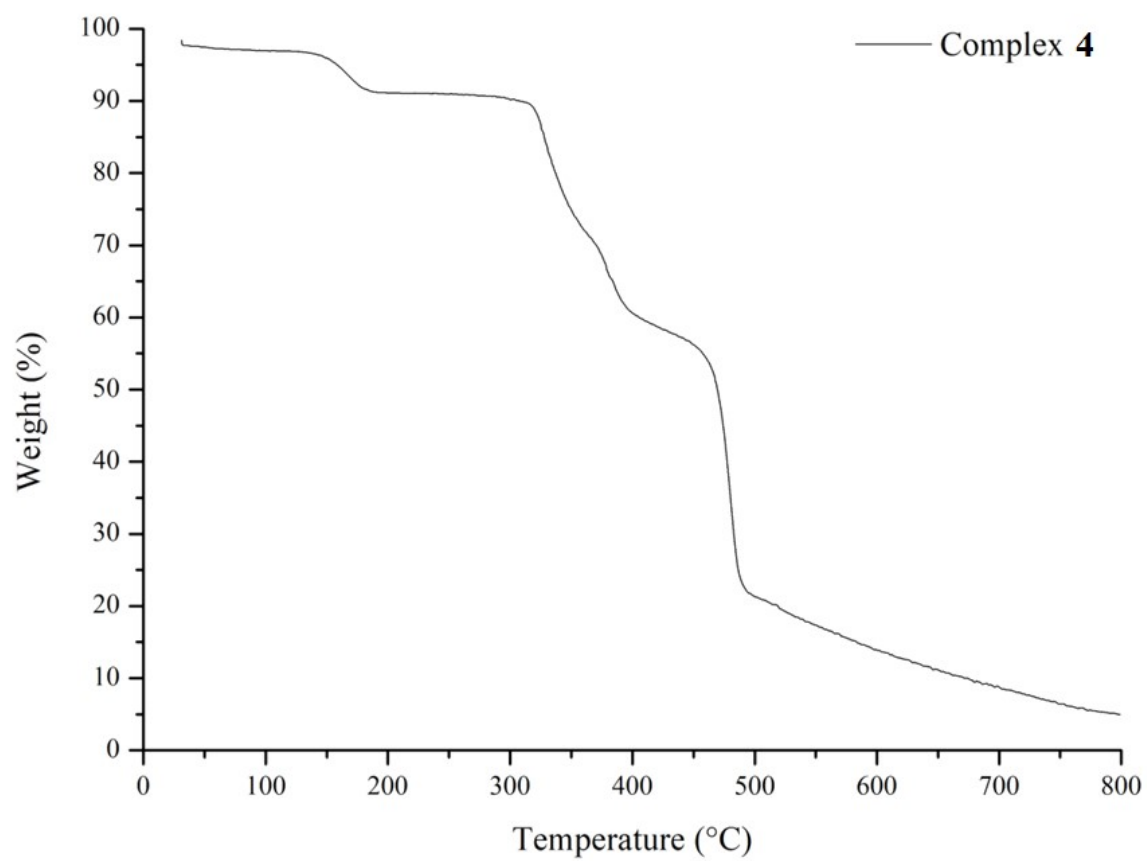

**Fig. S12.** TGA curve of complex **5**.

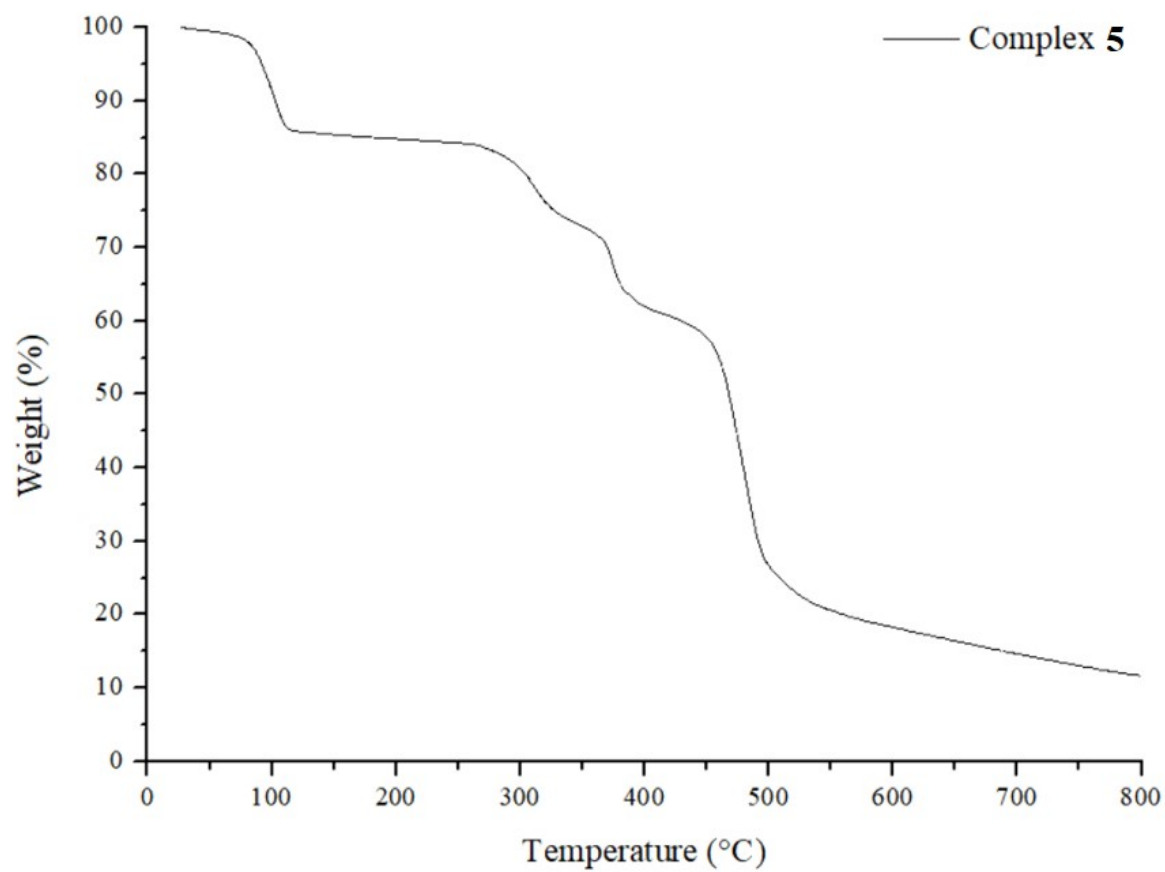

**Fig. S13.** PXRD patterns of complex **1** immersed in solvents.

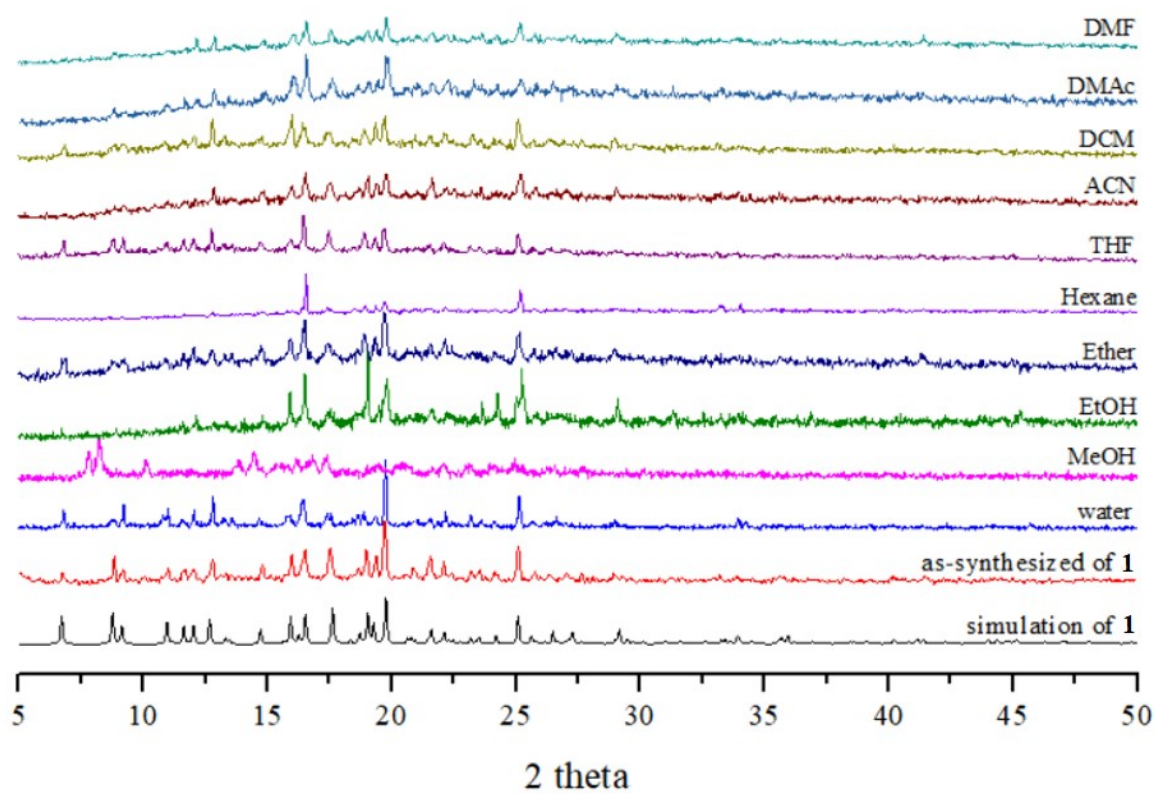



Fig. S14. PXRD patterns of complex **2** immersed in solvents.

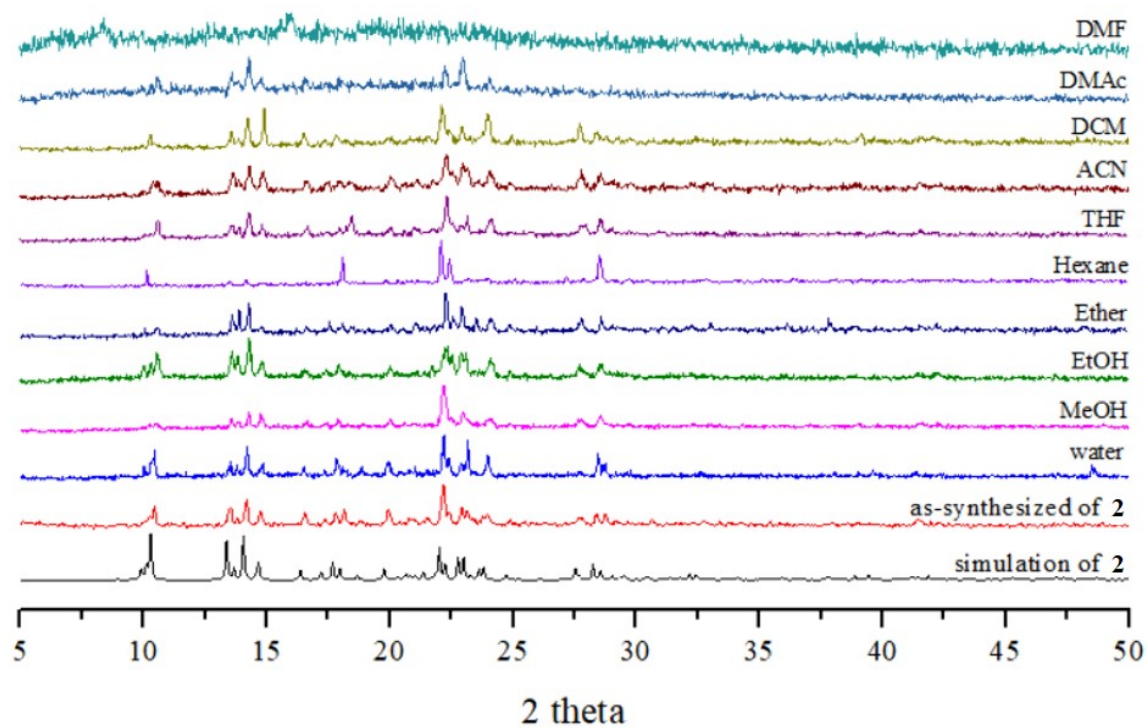

**Fig. S15.** PXRD patterns of complex **3** immersed in solvents.

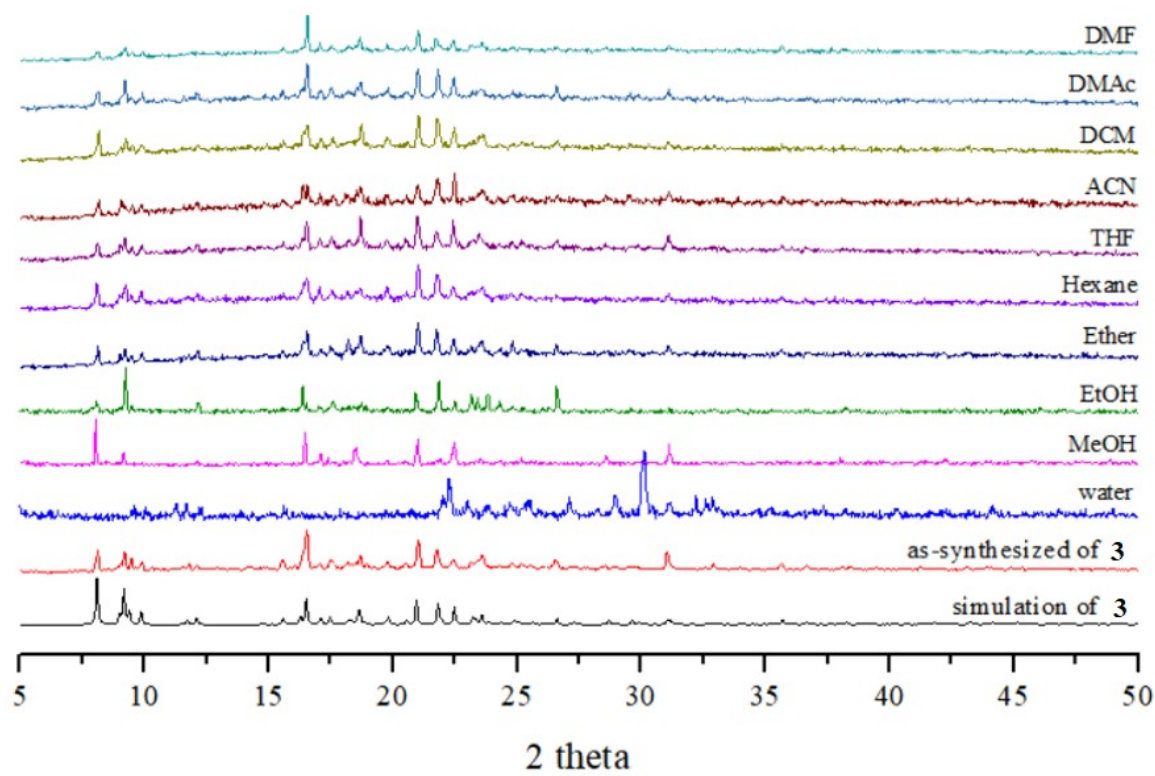

**Fig. S16.** PXRD patterns of complex **4** immersed in solvents.

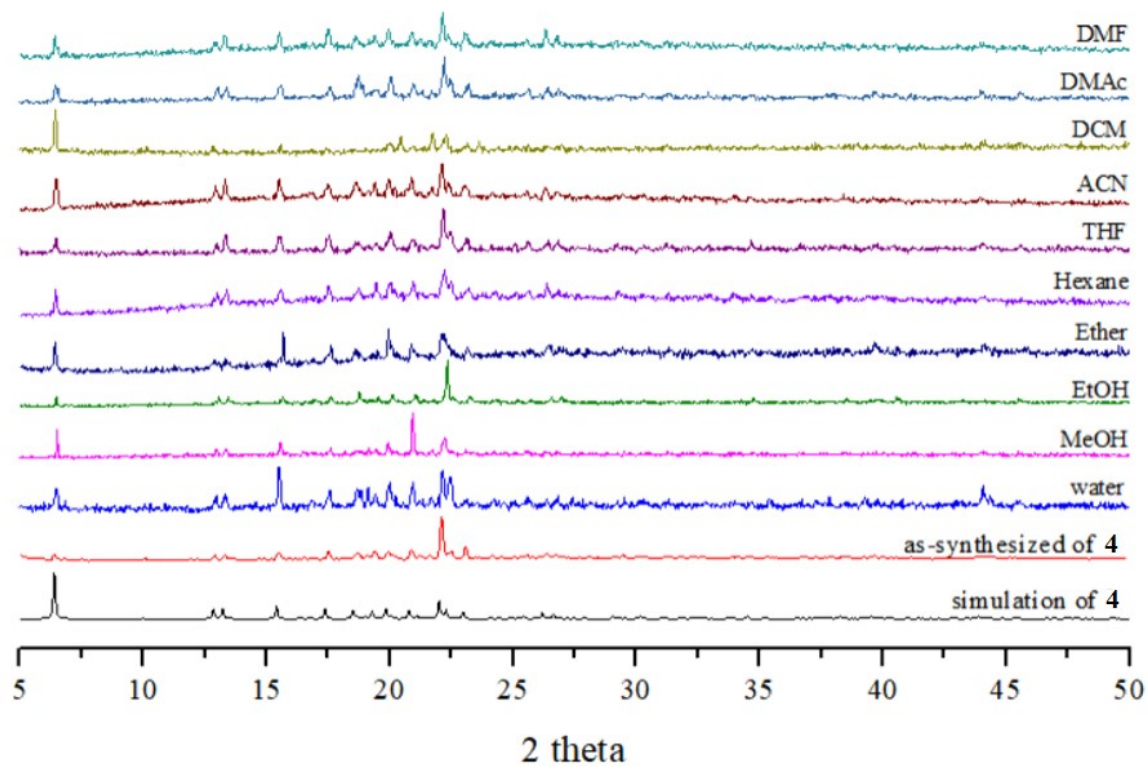

**Fig. S17.** (a) Photo and (b) PXRD patterns of complex **1** heated at 150 °C for 2 hrs and then immersed in a variety of organic solvents.

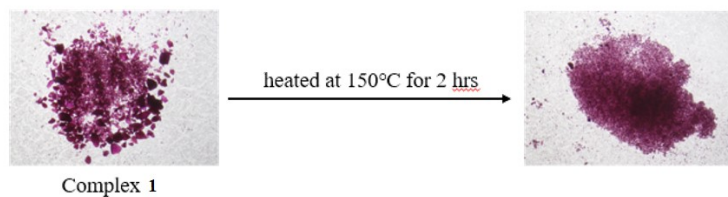

(a)

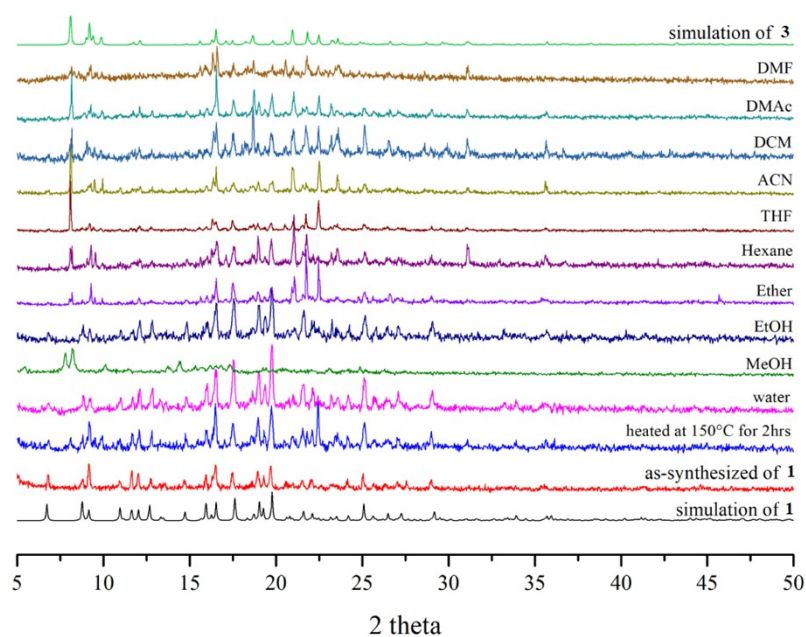

(b)

**Fig. S18.** Photo and PXRD patterns of complex **2** heated at 200 °C for 2 hrs.

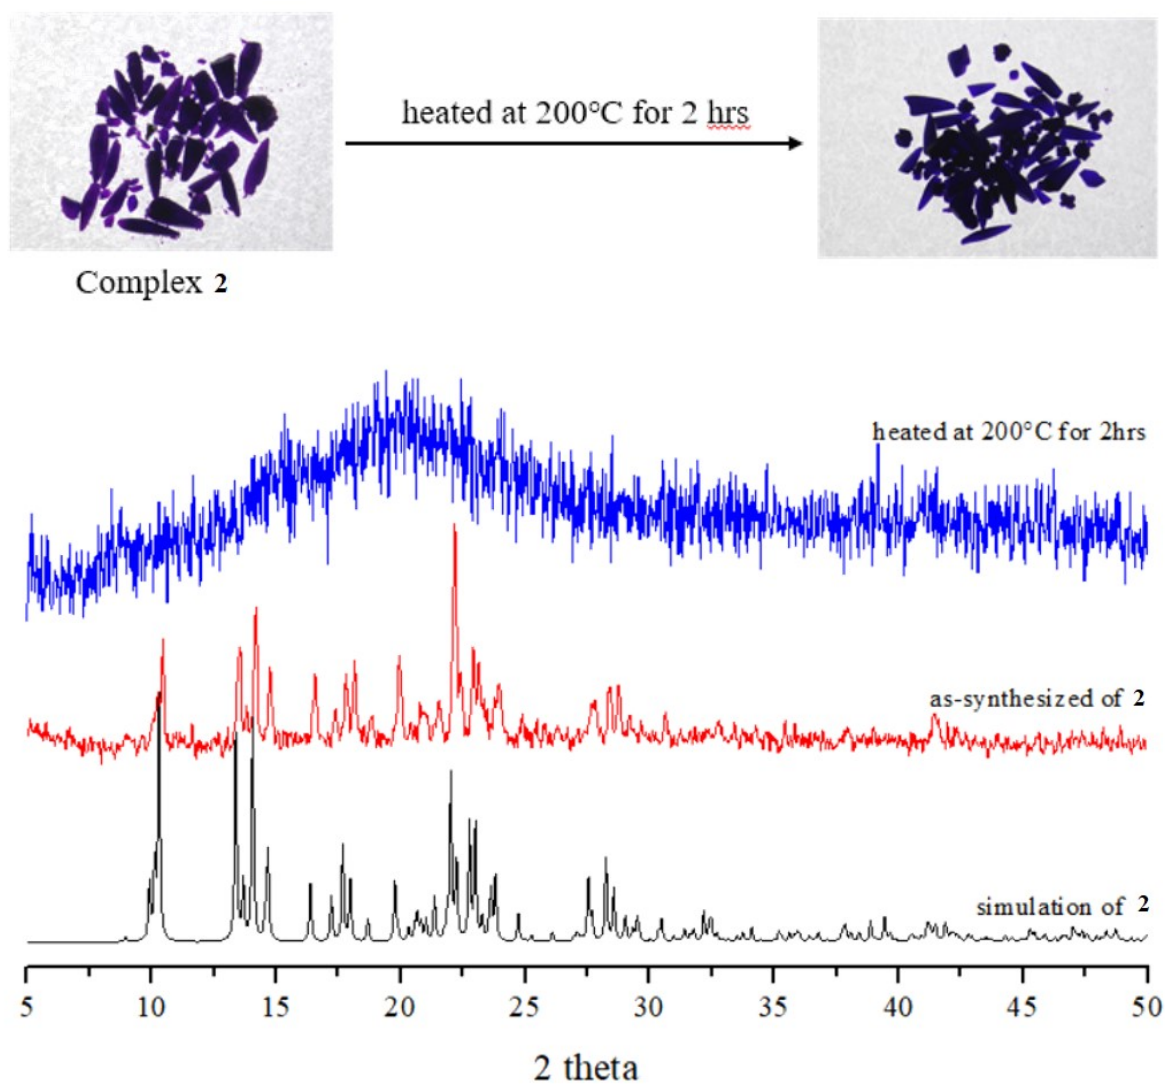



**Fig. S19.** Photo and PXRD patterns of complex **3** heated at 100 °C for 2 hrs and then immersed in a variety of organic solvents.

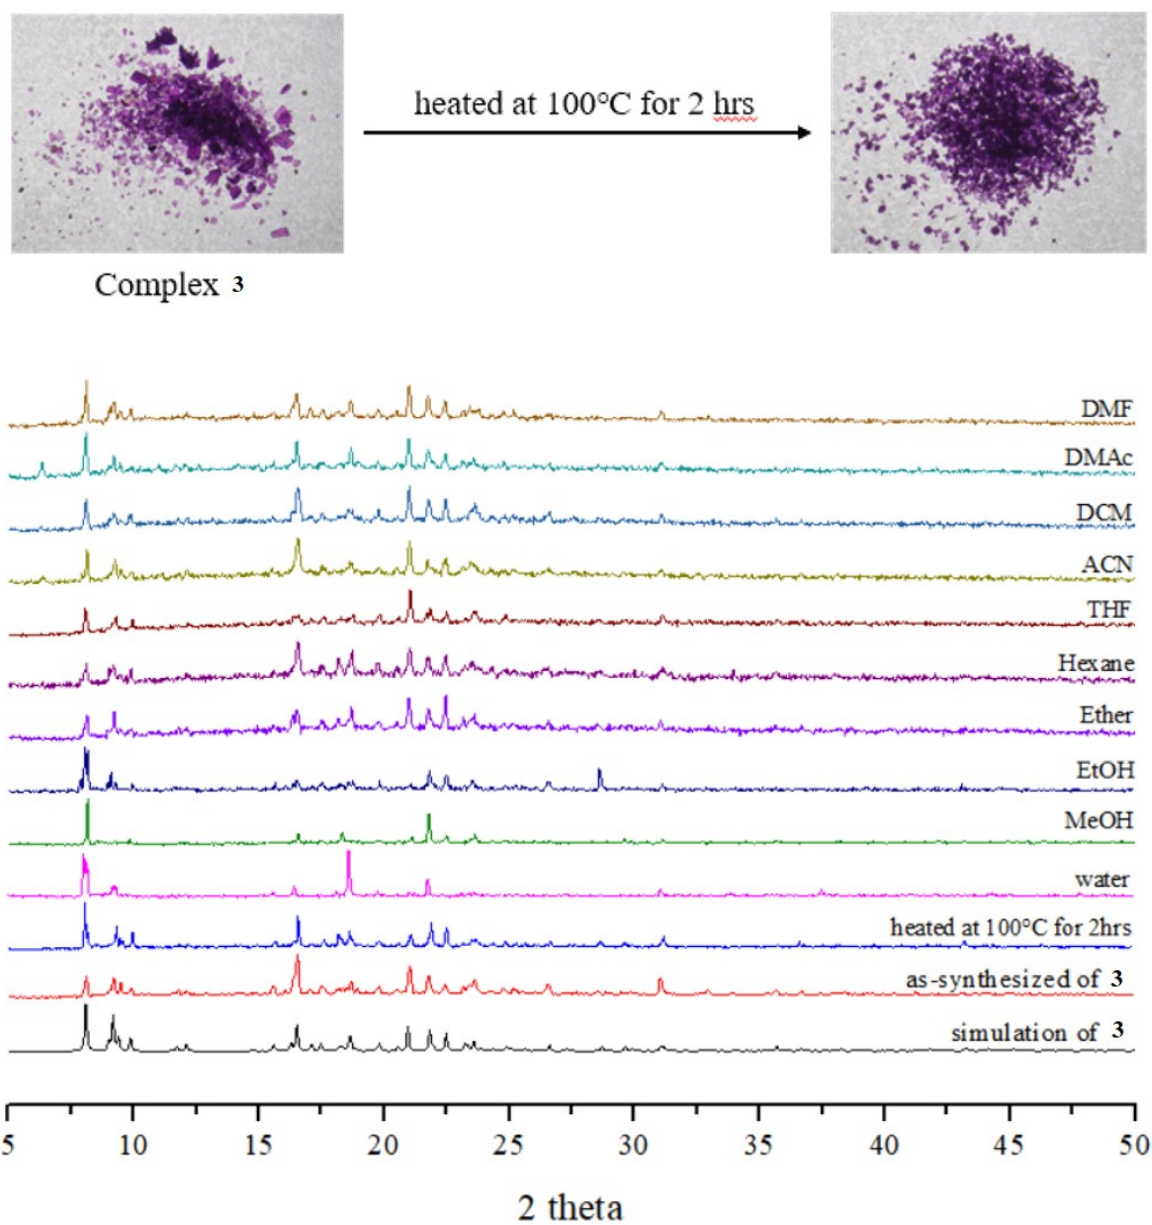

**Fig. S20.** (a) Photo and (b) PXRD patterns of complex 4 heated at 200 °C for 2 hrs and then immersed in a variety of organic solvents.

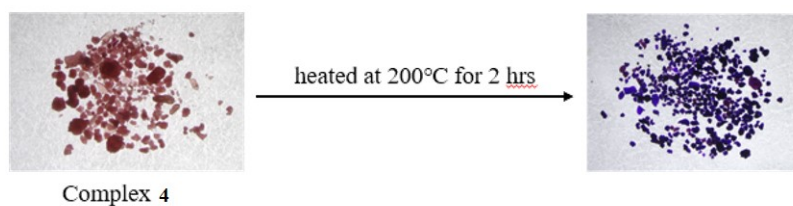

(a)

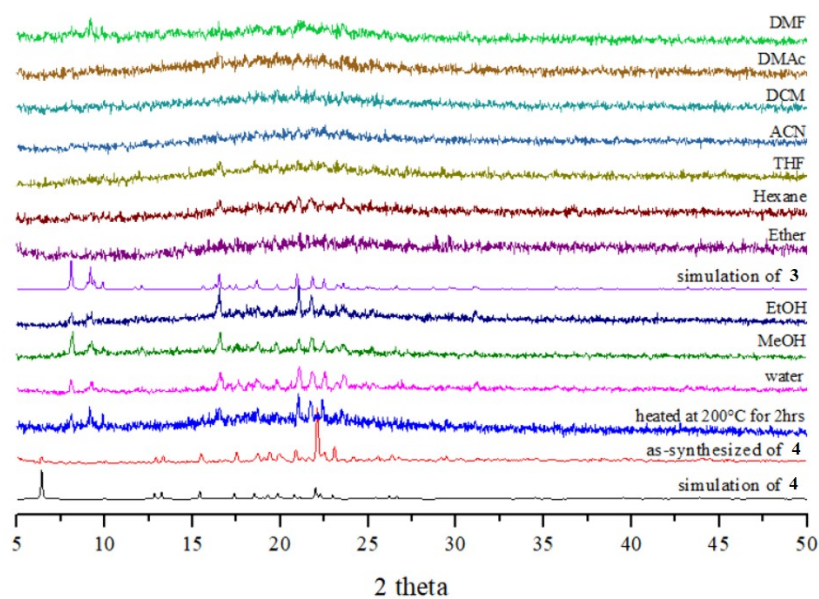

(b)

**Fig. S21.** PXRD patterns of complexes **1 - 4** heated hydrothermally at 120 °C.

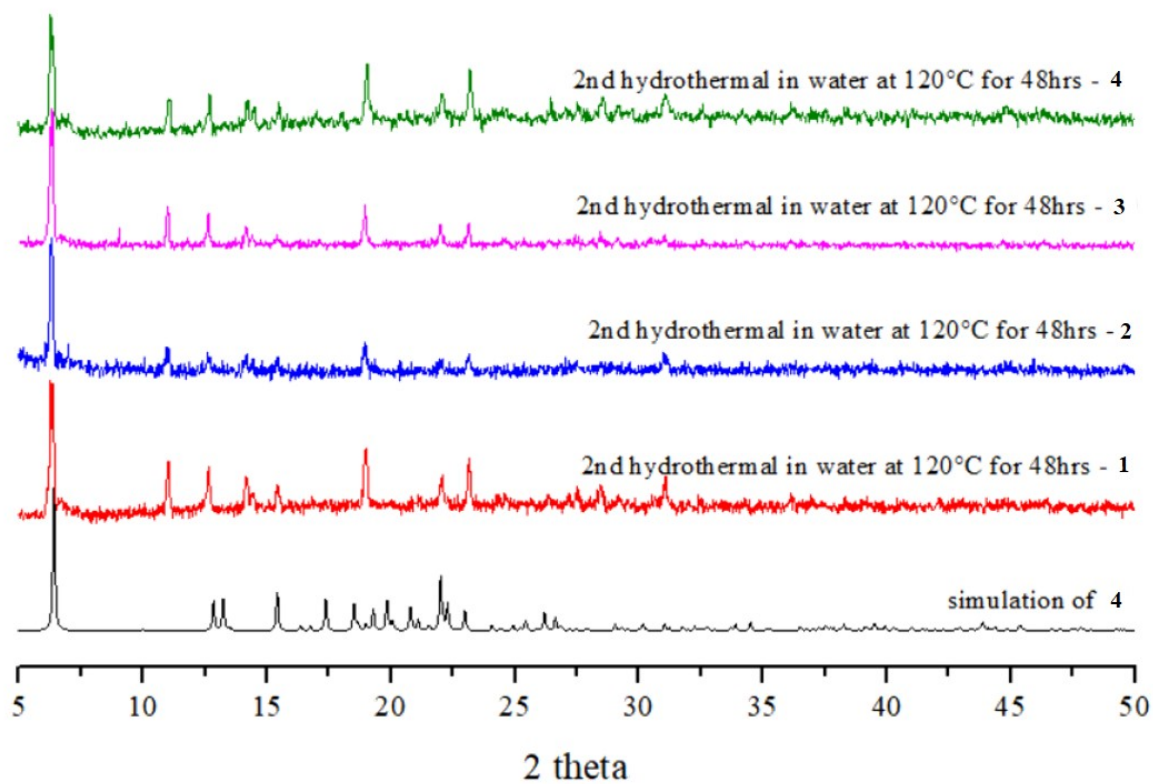



**Fig. S22.** IR spectra for complexes **1** - **4** heated hydrothermally at 120 °C.

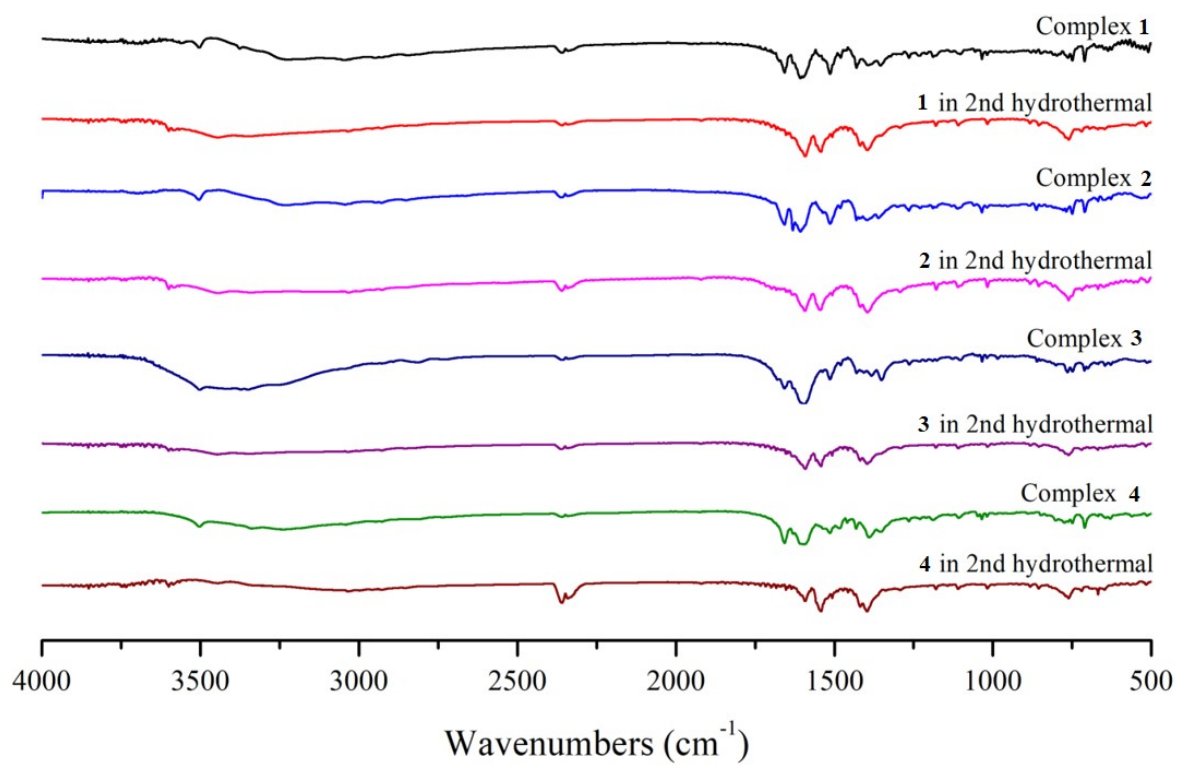

**Fig. S23.** Element analysis for MBA-unknown.

analytic functional testing  
UNICUBE  
serial number: 04.00.201071

| <b>Samples</b> |                |              |              |          |          |          |          |        |        |        |        |           |       |
|----------------|----------------|--------------|--------------|----------|----------|----------|----------|--------|--------|--------|--------|-----------|-------|
|                | Weight<br>[mg] | Name         | Method       | N<br>[%] | C<br>[%] | H<br>[%] | S<br>[%] | N Area | C Area | H Area | S Area | Date      | Time  |
| 49             | 1.992          | MBA-UNKNOWNC | 2mg Standard | 0.85     | 48.84    | 3.568    | 0.206    | 635    | 27 132 | 7 379  | 32     | 2023/5/23 | 01:30 |
| 50             | 1.989          | MBA-UNKNOWNC | 2mg Standard | 0.87     | 48.94    | 3.562    | 0.153    | 648    | 27 149 | 7 358  | 19     | 2023/5/23 | 01:42 |
